# Supplementary material
Source: PubMed Central journal article supplement (PMC5203619)
Supplement: AEM.02402-16_zam999117612s1.pdf [file AEM.02402-16_zam999117612s1.pdf]

**TABLE S1** Sources of isolation and general genome features of *L. plantarum* strains. The previously determined genomes of WCFS1 (1, 2) and *L. plantarum* type strain DSM20246, *L. plantarum* subsp. *plantarum* DSM20174 and *L. plantarum* subsp. *argentoratensis* DSM16365 (3) are indicated by #.

| Sources                                  | Accession No.           | Strains                      | GC content (%) | Size (bp) | Number of Subsystems | Number of Coding Sequences |
|------------------------------------------|-------------------------|------------------------------|----------------|-----------|----------------------|----------------------------|
| <b>Fermented Rice</b>                    | LEBT00000000            | <i>L. plantarum</i> K35      | 44.1           | 3,492,709 | 330                  | 3345                       |
|                                          | LEBW00000000            | <i>L. plantarum</i> K36      | 44.5           | 3,211,684 | 332                  | 3042                       |
|                                          | LEBS00000000            | <i>L. plantarum</i> T10      | 44.2           | 3,494,222 | 337                  | 3387                       |
| <b>Pla Pang Dang (Fermented fish)</b>    | LEBV00000000            | <i>L. plantarum</i> P14      | 44.3           | 3,346,627 | 335                  | 3257                       |
|                                          | LEBR00000000            | <i>L. plantarum</i> P22      | 44.3           | 3,303,556 | 327                  | 3123                       |
|                                          | LEBQ00000000            | <i>L. plantarum</i> P26      | 44.4           | 3,275,958 | 326                  | 3052                       |
|                                          | LEBP00000000            | <i>L. plantarum</i> P31      | 44.5           | 3,264,053 | 334                  | 3095                       |
|                                          | LEBO00000000            | <i>L. plantarum</i> P42      | 44.5           | 3,343,255 | 334                  | 3100                       |
|                                          | LEBN00000000            | <i>L. plantarum</i> P62      | 44.5           | 3,237,213 | 334                  | 3089                       |
|                                          | LEBM00000000            | <i>L. plantarum</i> P67      | 44.4           | 3,238,093 | 326                  | 3052                       |
|                                          | LEBL00000000            | <i>L. plantarum</i> P73      | 44.4           | 3,310,440 | 335                  | 3146                       |
|                                          | LEBK00000000            | <i>L. plantarum</i> P76      | 44.3           | 3,343,255 | 328                  | 3197                       |
| LEBJ00000000                             | <i>L. plantarum</i> P86 | 44.4                         | 3,237,213      | 323       | 3057                 |                            |
| <b>Fermented food (Pickled cabbage)</b>  | LEAW00000000            | <i>L. plantarum</i> TISTR875 | 44.4           | 3,225,632 | 329                  | 3055                       |
| <b>Shrimp intestine</b>                  | LEBI00000000            | <i>L. plantarum</i> MHO2.4   | 44.5           | 3,207,275 | 329                  | 3047                       |
|                                          | LEBH00000000            | <i>L. plantarum</i> MHO2.5   | 44.4           | 3,349,544 | 337                  | 3195                       |
|                                          | LEBG00000000            | <i>L. plantarum</i> MHO2.9   | 44.3           | 3,338,588 | 333                  | 3190                       |
| <b>Marine fish</b>                       | LEBF00000000            | <i>L. plantarum</i> A3       | 44.2           | 3,394,509 | 336                  | 3237                       |
| <b>infant feces 8 months</b>             | LEBE00000000            | <i>L. plantarum</i> I08      | 44.4           | 3,313,485 | 330                  | 3170                       |
| <b>infant feces 6 months</b>             | LEBU00000000            | <i>L. plantarum</i> I61      | 44.4           | 3,314,417 | 330                  | 3167                       |
| <b>Infant feces 5 months (aerobic)</b>   | LEBD00000000            | <i>L. plantarum</i> CIF17A2  | 45.1           | 3,105,497 | 330                  | 2945                       |
|                                          | LEBC00000000            | <i>L. plantarum</i> CIF17A4  | 45.1           | 3,107,640 | 329                  | 2932                       |
|                                          | LEBB00000000            | <i>L. plantarum</i> CIF17A5  | 45.1           | 3,106,602 | 329                  | 2939                       |
| <b>Infant feces 5 months (anaerobic)</b> | LEBA00000000            | <i>L. plantarum</i> CIF17AN2 | 45.1           | 3,128,930 | 330                  | 2942                       |
|                                          | LEAZ00000000            | <i>L. plantarum</i> CIF17AN8 | 45.1           | 3,107,439 | 330                  | 2942                       |
| <b>Human</b>                             | LEAV00000000            | <i>L. plantarum</i> 299V     | 44.4           | 3,304,086 | 330                  | 3134                       |
| <b>Pickled cabbage</b>                   | LEAY00000000            | <i>L. plantarum</i> DSM2601  | 44.5           | 3,199,427 | 329                  | 3020                       |
|                                          | #                       | <i>L. plantarum</i> DSM20174 | 44.5           | 3,208,905 | 335                  | 3060                       |
| <b>Plant material</b>                    | LEAX00000000            | <i>L. plantarum</i> DSM20246 | 44.4           | 3,242,593 | 331                  | 3063                       |
| <b>Fermented cassava roots</b>           | #                       | <i>L. plantarum</i> DSM16365 | 45             | 3,201,989 | 334                  | 2999                       |
| <b>Human (oral cavity)</b>               | NC_004567.2             | <i>L. plantarum</i> WCSF1    | 44.5           | 3,308,274 | 330                  | 3013                       |

**Fig. S1** Pan and core genome of 28 *L. plantarum* strains isolated from various sources.

Pan genome

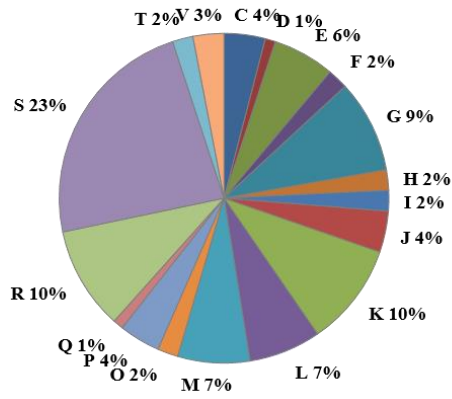

- C: Energy production and conversion
- D: Cell cycle control, cell division, chromosome partitioning
- E: Amino acid transport and metabolism
- F: Nucleotide transport and metabolism
- G: Carbohydrate transport and metabolism
- H: Coenzyme transport and metabolism
- I: Lipid transport and metabolism
- J: Translation, ribosomal structure and biogenesis
- K: Transcription
- L: Replication, recombination and repair
- M: Cell wall/membrane/envelope biogenesis
- O: Post-translational modification, protein turnover, and chaperones
- P: Inorganic iron transport and metabolism
- Q: Secondary metabolites biosynthesis, transport, and catabolism
- R: General function prediction only
- S: Function unknown
- T: Signal transduction mechanisms
- V: Defense mechanisms

Core genome

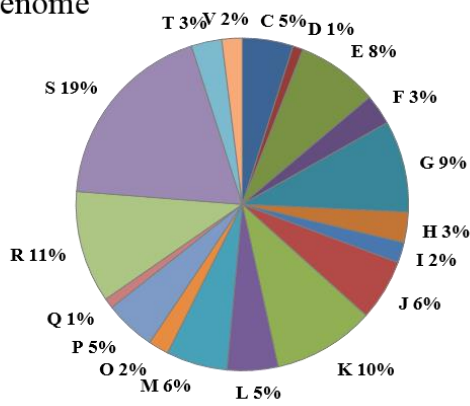

**Fig. S2** Analysis of genome diversity based on carbohydrate gene presence and absence in *L. plantarum* isolated from various sources by using Mega 6 programme, dark orange colour: gene presence in the genome, white orange colour: gene absence in the genome. The PTS and other transport and metabolic genes for the following carbohydrates were identified: 1: Trehalose biosynthesis; 2: Sucrose utilization; 3: Fructooligosaccharide (FOS) and raffinose utilization; 4: Lactose utilization; 5: Maltose and maltodextrin utilization; 6: Beta-glucoside metabolism; 7: Trehalose uptake and utilization; 8: Lactose and galactose uptake utilization; 9: Mannose metabolism; 10: D-Tagatose and galactitol utilization; 11: D-gulconate and ketogluconates metabolism; 12: Fructose utilization; 13: D-ribose utilization; 14: L-rhamnose utilization; 15: D-sorbitol (D-glucitol) and L-sorbose utilization; 16: L-arabinose utilization; 17: Glycerol and glycerol-3-phosphate uptake and utilization; 18: Mannitol utilization; 19: Inositol catabolism.

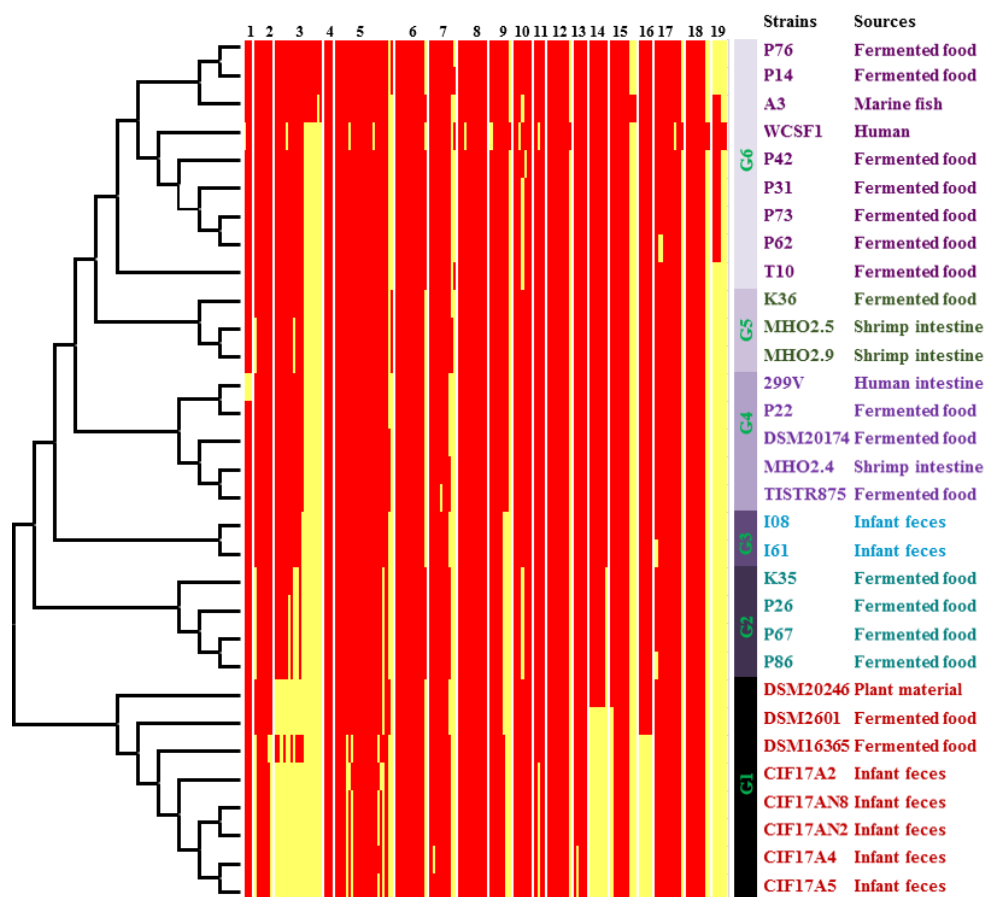

**Fig. S3** Genes involved in carbohydrate metabolism in the RAST-annotated genomes of the *L. plantarum* strains.

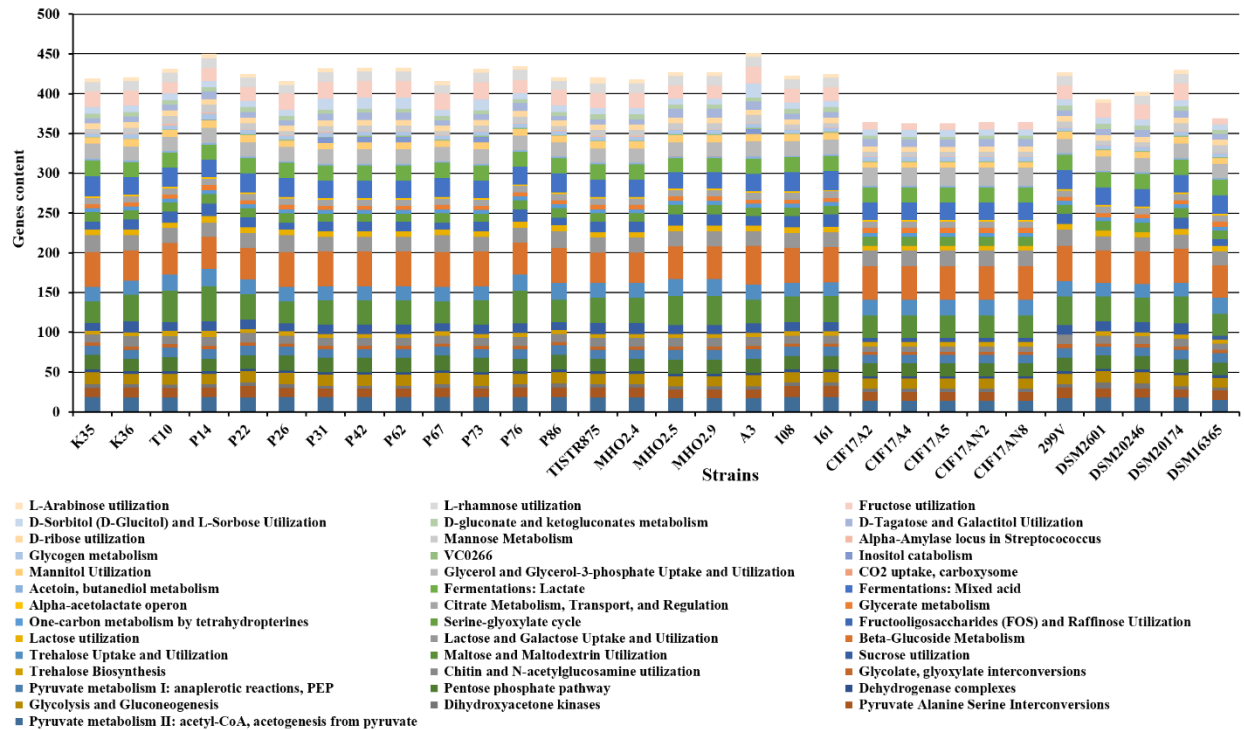

**Fig. S4** Phylogenetic tree based on amino acid sequence of beta-fructosidase of *L. plantarum*.

The tree was constructed by using MAGA 6 (NJ plot with 1000 bootstraps value, P-distance model).

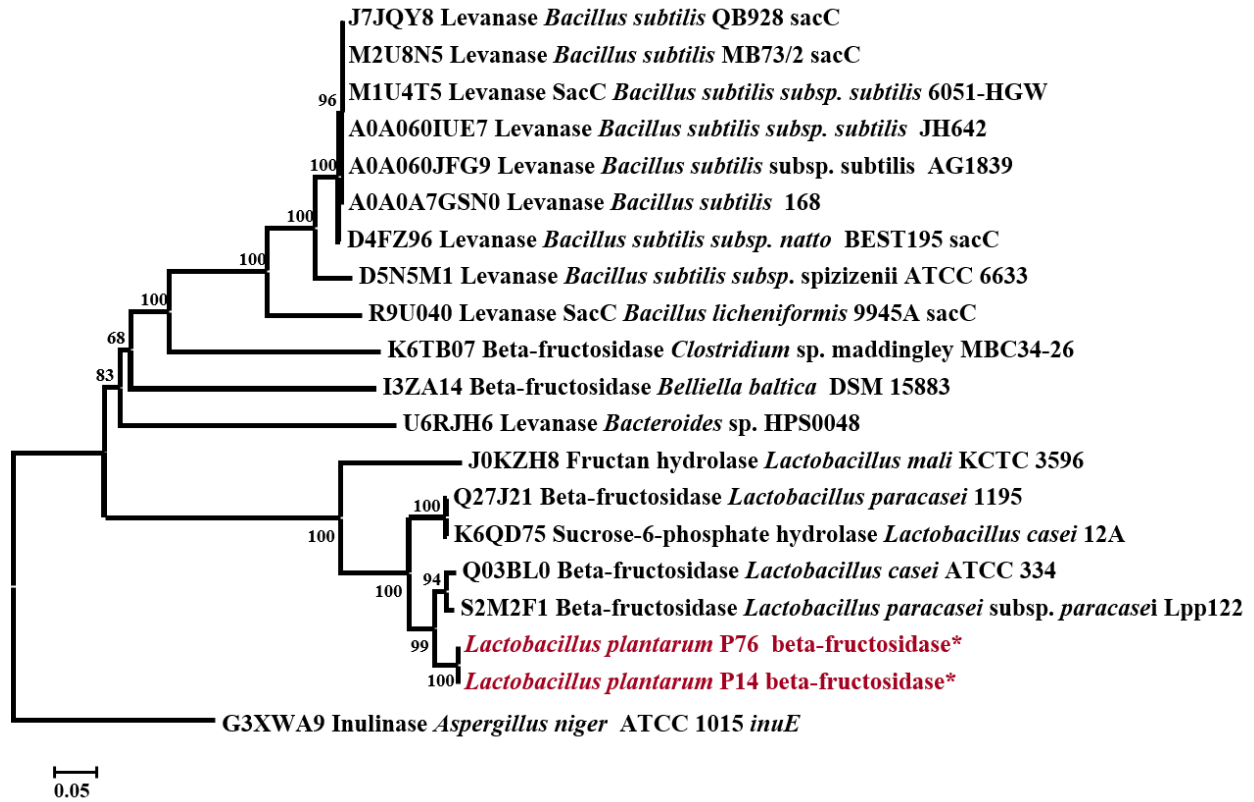

## References

- 1. Sun Z, Harris HM, McCann A, Guo C, Argimón S, Zhang W, Yang X, Jeffery IB, Cooney JC, Kagawa TF, Liu W, Song Y, Salvetti E, Wrobel A, Rasinkangas P, Parkhill J, Rea MC, O'Sullivan O, Ritari J, Douillard FP, Paul Ross R, Yang R, Briner AE, Felis GE, de Vos WM, Barrangou R, Klaenhammer TR, Caufield PW, Cui Y, Zhang H, O'Toole PW.** 2015. Expanding the biotechnology potential of lactobacilli through comparative genomics of 213 strains and associated genera. *Nat Commun* **6**:8322.  
doi:10.1038/ncomms9322
- 2. Kleerebezem M, Boekhorst J, van Kranenburg R, Molenaar D, Kuipers OP, Leer R, Tarchini R, Peters SA, Sandbrink HM, Fiers MW, Stiekema W, Lankhorst RM, Bron PA, Hoffer SM, Groot MN, Kerkhoven R, de Vries M, Ursing B, de Vos WM, Siezen RJ.** 2003. Complete genome sequence of *Lactobacillus plantarum* WCFS1. *Proc Natl Acad Sci USA* **100**:1990-1995. doi: 10.1073/pnas.0337704100
- 3. Siezen R, Tzeneva VA, Castioni A, Wels M, Phan HTK, Rademaker JLW, Starrenburg MJC, Kleerebezem M, Molenaar D, van Hylckama Vlieg JET.** 2010. Phenotypic and genomic diversity of *Lactobacillus plantarum* strains isolated from various environmental niches. *Environ Microbiol* **12**:758-773. doi: 10.1111/j.1462-2920.2009.02119.x.
